# Supplementary material
Source: PubMed Central journal article supplement (PMC4187853)
Supplement: IAI.02222-14_zii999090887so1.pdf [file IAI.02222-14_zii999090887so1.pdf]

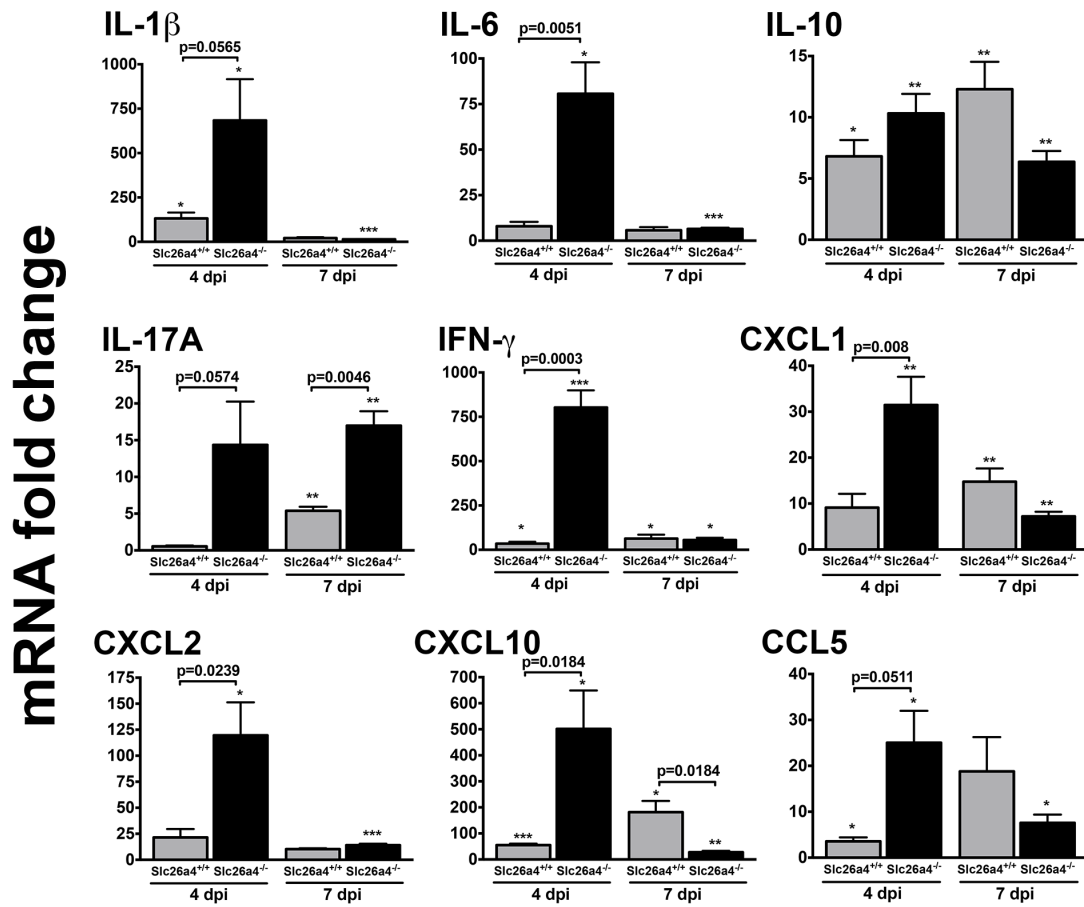

**Figure S1. Cytokine and chemokine levels are higher in infected pendrin KO mice.** Pendrin-expressing (grey bars) and knockout (black bars) littermate mice (n=4) were inoculated with *B. pertussis* and the levels of lung cytokine and chemokine gene expression were compared by qPCR on 4 and 7 dpi. \*p<0.05, \*\*p<0.01, \*\*\*p<0.001, relative to strain matched control PBS inoculated mice.

**Table S1. List of genes differentially expressed upon *B. pertussis* infection 4 dpi.**

| Gene          | <i>B. pertussis</i> vs PBS inoculation mean fold change <sup>s</sup> |                               |
|---------------|----------------------------------------------------------------------|-------------------------------|
|               | <i>Slc26a4</i> <sup>+/+</sup>                                        | <i>Slc26a4</i> <sup>-/-</sup> |
| <i>Apcs</i>   | -1.2095                                                              | -3.2069                       |
| <i>C5ar1</i>  | 1.5183                                                               | 2.4482                        |
| <i>Ccl12</i>  | 5.2548                                                               | 11.0587                       |
| <i>Ccl5</i>   | 1.7000                                                               | 5.9643*                       |
| <i>Ccr4</i>   | 2.5059                                                               | 1.0467                        |
| <i>Ccr5</i>   | 2.4892                                                               | 8.2717*                       |
| <i>Cd14</i>   | 3.7334                                                               | 4.6311                        |
| <i>Cd40</i>   | 1.0675                                                               | 2.8305                        |
| <i>Cd80</i>   | 1.8564                                                               | 3.6841                        |
| <i>Cd86</i>   | 1.7375                                                               | 3.2216                        |
| <i>Csf2</i>   | 2.0649                                                               | 1.2926                        |
| <i>Cxcl10</i> | 41.4944                                                              | 196.9195**                    |
| <i>Fasl</i>   | 1.8501                                                               | 3.6441                        |
| <i>H2-Q10</i> | 2.9883                                                               | 6.4738                        |
| <i>H2-T23</i> | 1.2850                                                               | 2.1431                        |
| <i>Ifnb1</i>  | 2.2869                                                               | 3.8177**                      |
| <i>Ifng</i>   | 21.5667                                                              | 299.6255*                     |
| <i>Il10</i>   | 5.9466                                                               | 7.2044***                     |
| <i>Il13</i>   | -1.4772                                                              | -3.2977                       |

|                |          |            |
|----------------|----------|------------|
| <i>Il17a</i>   | 11.5014  | 96.6510*   |
| <i>Il1a</i>    | 1.9211   | 7.8420**   |
| <i>Il1b</i>    | 18.7707  | 73.6700**  |
| <i>Il2</i>     | -2.0711  | -2.4869    |
| <i>Il23a</i>   | 4.0735   | 10.8568*   |
| <i>Il4</i>     | -1.4148  | 6.1115     |
| <i>Il5</i>     | -1.6085  | -14.1278*  |
| <i>Il6</i>     | 60.8062  | 119.9329** |
| <i>Irak1</i>   | -1.4148  | -2.5310    |
| <i>Irf3</i>    | -1.6085  | -3.6329    |
| <i>Irf7</i>    | 2.4636   | 11.1712*   |
| <i>Itgam</i>   | 1.7915   | 3.1521     |
| <i>Mapk1</i>   | -1.0954  | -2.1654    |
| <i>Mapk8</i>   | -1.2772  | -2.6134    |
| <i>Mbl2</i>    | 1.0800   | -3.5364    |
| <i>Mpo</i>     | 1.6990   | -3.4195    |
| <i>Mx1</i>     | 2.5495   | 8.0312*    |
| <i>Myd88</i>   | 1.5889   | 2.1753     |
| <i>Nlrp3</i>   | 3.5717   | 16.6997*   |
| <i>Nod2</i>    | 1.4134   | 2.0253     |
| <i>Rag1</i>    | -10.2260 | -4.2124    |
| <i>Rorc</i>    | -1.3502  | -2.7183    |
| <i>Slc11a1</i> | 1.5348   | 3.1264     |

|              |         |           |
|--------------|---------|-----------|
| <i>Stat1</i> | 2.3382  | 6.8268**  |
| <i>Tbx21</i> | 2.3469  | 5.3853    |
| <i>Tlr1</i>  | 1.4170  | 3.4303    |
| <i>Tlr2</i>  | 2.1288  | 3.7858    |
| <i>Tlr5</i>  | -1.2796 | -4.2142   |
| <i>Tlr6</i>  | 1.4192  | 4.6039    |
| <i>Tlr7</i>  | 1.9533  | 3.7600    |
| <i>Tlr8</i>  | 1.5889  | 2.8160    |
| <i>Tlr9</i>  | 1.7680  | 7.2562**  |
| <i>Tnf</i>   | 3.8837  | 24.5589** |

§ Only those genes that displayed a >2-fold change over PBS inoculated expression levels for either mouse strain are shown. Those transcripts that were significantly altered in infected pendrin KO (*Slc26a4*<sup>-/-</sup>) compared with infected pendrin-expressing (*Slc26a4*<sup>+/+</sup>) mouse lungs are indicated, \*p<0.05, \*\*p<0.01, \*\*\*p<0.001.

**Table S2. List of primers used in this study.**

| <b>Gene</b>                    | <b>Forward primer sequence</b>    | <b>Reverse primer sequence</b> |
|--------------------------------|-----------------------------------|--------------------------------|
| <i>Slc26a4</i>                 | 5'-CATACAGCTGGTGTGTTGGAGG-3'      | 5'-GTGTAGATAATGGAGAGGATGCCG-3' |
| <i>Il-1<math>\beta</math></i>  | 5'-TGTGAAATGCCACCTTTTGA-3'        | 5'-GGTCAAAGGTTTGAAGCAG-3'      |
| <i>Il-6</i>                    | 5'-TGTCTATAACCACTTCACAAGTCGGAG-3' | 5'-GCACAACCTTTTTCTCATTCCAC-3'  |
| <i>Il-10</i>                   | 5'-ATTTGAATTCCCTGGGTGAGAAG-3'     | 5'-CACAGGGGAGAAATCGATGACA-3'   |
| <i>Il-17a</i>                  | 5'-CTGTGTCTCTGATGCTGTTGC-3'       | 5'-GAACGGTTGAGGTAGTCTGAGG-3'   |
| <i>Ifn-<math>\gamma</math></i> | 5'-GGAGGAACTGGCAAAAGGATG-3'       | 5'-GACGCTTATGTTGTTGCTGATGG-3'  |
| <i>Cxcl1</i>                   | 5'-GCTTGAAGGTGTTGCCCTCA-3'        | 5'-GTGGCTATGACTTCGGTTTGG-3'    |
| <i>Cxcl2</i>                   | 5'-ACCAACCACCAGGCTACAGG-3'        | 5'-CAGGCATTGACAGCGCAGT-3'      |
| <i>Cxcl10</i>                  | 5'-GCTGCCGTCATTTTCTGC-3'          | 5'-TCTCACTGGCCCGTCATC-3'       |
| <i>Ccl5</i>                    | 5'-TGCAGAGGACTCTGAGACAGC-3'       | 5'-GAGTGGTGTCCGAGCCATA-3'      |
